# Supplementary material
Source: PubMed Central journal article supplement (PMC3433768)

## SUPPLEMENTARY FIGURE LEGENDS

**Supplementary figure S1.** Regulation of fatty acid oxidation by PML and predisposition to obesity in *Pml*-KO mice.

(A) Fatty acid oxidation levels in *Pml*-WT and KO transformed (Ras-E1A) MEFs. \*,  $p < 0.05$ ; error bars indicate S.D. from triplicates.

(B-C) food intake (B) and activity (C) in *Pml*-WT and KO male mice subjected to a control (LF) or high fat (HF) diet.

(D) Pml immunoreactivity in  $Lep^{Ob/+}$  (left panels) and  $Lep^{Ob/Ob}$  liver sections at 3 months of age. Asterisk depicts PML immunoreactivity in macrophages, arrows indicate PML immunoreactivity in hepatocytes.

(E) Representative picture (2 months old animals) of *Pml*- $Lep^{Ob/Ob}$  double mutant female mice (Left,  $Pml^{WT}$ - $Lep^{Ob/Ob}$ ; right,  $Pml^{KO}$ - $Lep^{Ob/Ob}$ ).

(F-J) Body weight (F), Fat mass (G, H) and lean mass (I, J) in  $Pml^{WT}$  and  $Pml^{KO}$   $Lep^{Ob/Ob}$  mice of the indicated sex and age.

**Supplementary figure S2.** Pml regulates PGC1A and PPAR signaling.

(A) Gene validation from the differentially expressed genes in *Pml*-WT and KO liver extract microarray by real-time PCR (N=7-8) using *36b4/Rplp0* as endogenous control. Error bars represent S.E. p-value indicates statistical significance by two-tailed T-test.

(B) Real-time PCR analysis of *Pdk4* in primary MEFs treated with palmitate and carnitine (P+C; 100 $\mu$ M and 1mM, respectively, N=4) using *Glucuronidase B* as endogenous control. Error bars represent S.D. p-value indicates statistical significance by T-test.

(C) PML over-expression in HEK293 cells shown in **Fig. 3B**.

(D) Immunofluorescence and confocal imaging of HA-PGC1A and endogenous PML in U2OS cells, in the absence (left) or presence (right) of exogenous Flag-GCN5.

(E) Immunofluorescence and confocal imaging of HA-PGC1A and PML in U2OS cells, arrows indicate areas of co-localization (DAPI staining is shown in blue).

(F) Immunofluorescence and confocal imaging of HA-PGC1A, Flag-GCN5 and EGFP-PML in U2OS cells.

(G) Co-immunoprecipitation of Flag-PML with HA-PGC1A and GCN5.

(H) Western Blot for detection of PGC1A acetylation in PGC1A immunoprecipitates from U2OS cells transfected with empty or PML-expressing vectors and treated with Vehicle or the SIRT1 inhibitor EX527 (10 $\mu$ M, 3h).

(I) Immunofluorescence and confocal imaging of HA-PGC1A, Flag-SIRT1 and EGFP-PML in U2OS cells, which also express non-tagged GCN5.

**Supplementary figure S3.** Effect of PML and PPARA on survival upon loss of attachment.

(A-B) Cell survival measured by alamar Blue (A) and Cell Titer Glo (Promega) (B) at the indicated time points in detached MCF10A cells from (Fig. 4A).

(C) Western blot analysis of PML and HSP90 in MDA-MB-231 and MCF7 breast cancer cells.

(D) Cell survival upon 60h detachment in cells from (C) treated with vehicle or GW6471 (10 $\mu$ M). \*p indicates statistical significance (student T test) compared to vehicle-treated cells; #p indicates statistical significance (student T test) compared to GW6471-treated MCF7 cells.

(E) Effect of Etomoxir on luminal filling in pBABE-infected MCF10A cells (following the experimental design outlined in Fig. 5D; representative images are shown).

**Supplementary figure S4.** Status of PML in breast cancer specimens.

(A) Representative micrographs of PML immunoreactivity in normal breast epithelium, scored as absent (PML 0) or low (PML 1+)

(B) Representative pictures of the scoring criteria used in human breast cancer samples. Asterisks depict PML immunoreactive epithelial cells.

(C) Correlation analysis between PML mRNA levels and tumor or stromal cell immunoreactivity in breast cancer biopsies (N=88).

**Supplementary figure S5.** PML expression is elevated in basal breast cancer biopsies. Expression of PML by means of 4 different probes in two independent studies. P value indicates the statistical value of the difference in basal cancers vs. rest of the tumors.

**Supplementary figure S6.** PML expression is elevated in tumors with mutated *Tp53*.

(A) Correlation of p53 up-regulation and PML expression in the samples analyzed. p-value reflects chi-square statistical significance in the correlation analysis.

(B) Heatmap (upper panel) and boxplots (lower panels) depicting PML levels in *p53* WT and mutant (Mu) cancer dataset (Miller et al., 2005). Upper legends in boxplots indicate probe ID (left) and statistical significance (p-value, right).

(C) Time to recurrence in breast cancer patients from Figures 6-7, excluding those harboring TNBC/basal cancers.

**Supplementary figure S7.** Association between PML expression and PPAR signaling in breast cancer.

(A) Heatmap depicting the status of 84 genes down-regulated in *Ppara*-KO mice liver microarray in breast cancers expressing different levels of PML (from **Fig. 7C**).

(B) Validation of genes from (A) by Real-Time quantitative PCR ( $\beta$ -ACTIN was used as housekeeping gene, similar results were obtained with GAPDH). p-value was obtained by two-tailed T test.

(C) GSEA showing significant enrichment of activated PPAR gene signature in PML high (3+) expressing tumors when compared to PML non-expressing tumors (0; upper panel) or the rest of the tumors (0, 1+, 2+; lower panel). The enrichment is represented by Norminal p-value and normalized enrichment score (NES).

**Supplementary table 1.** Differentially expressed genes in *Pml*-WT and KO liver tissue microarray.

**Supplementary table 2.** Promoter analysis in lipid metabolism-related genes differentially expressed between *Pml*-WT and KO.

**Supplementary table 3.** Molecular - histological features and microarray accession numbers of breast cancer biopsies analyzed for this study.

# Supplementary Figure S1

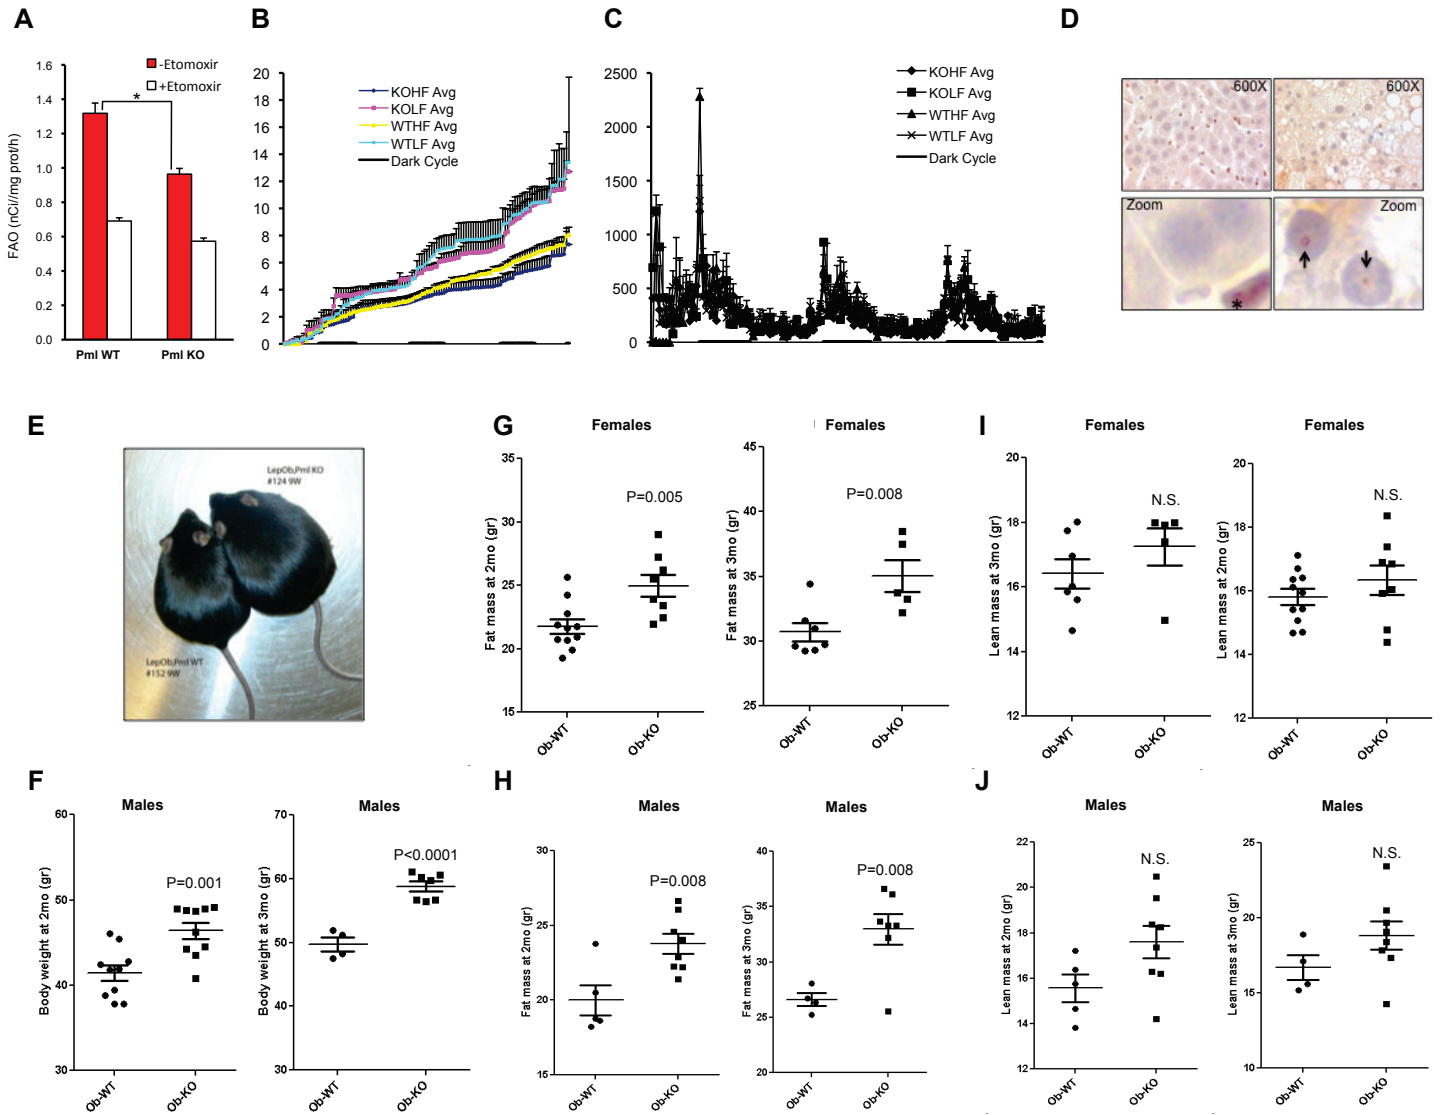

# Supplementary Figure S2

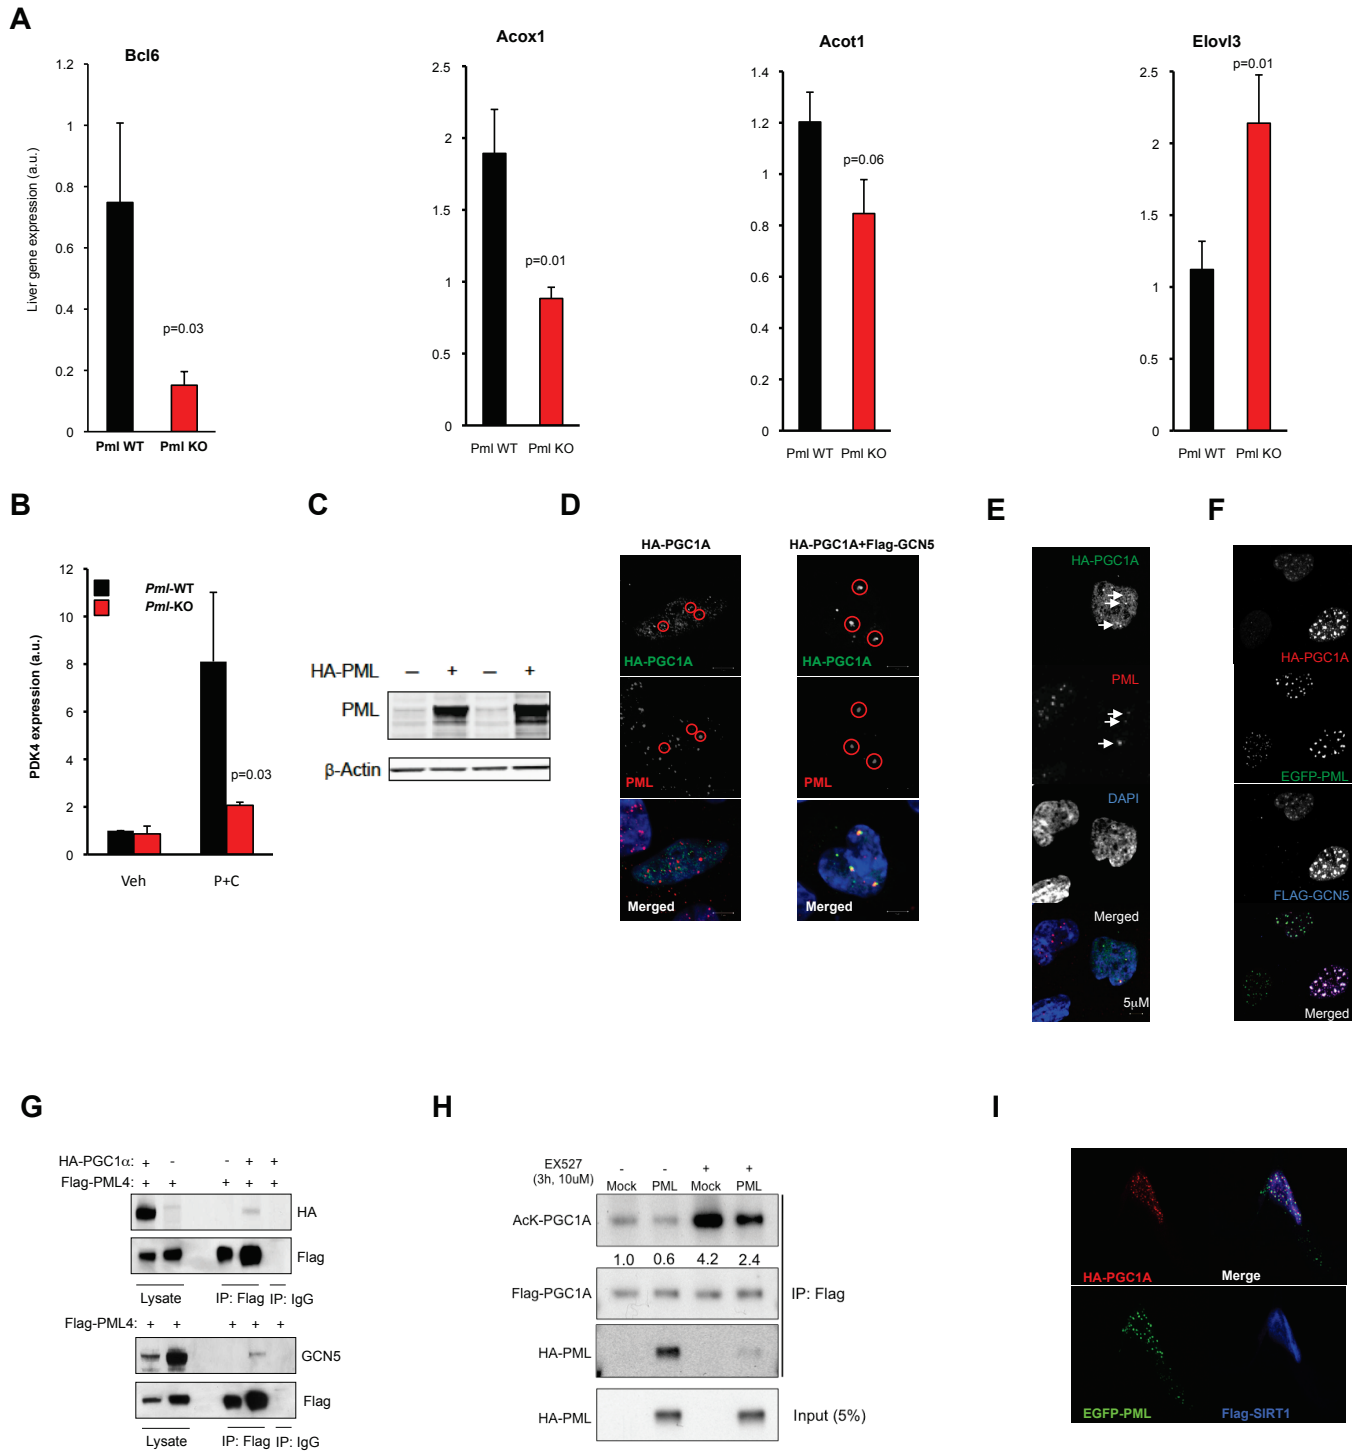

# Supplementary Figure S3

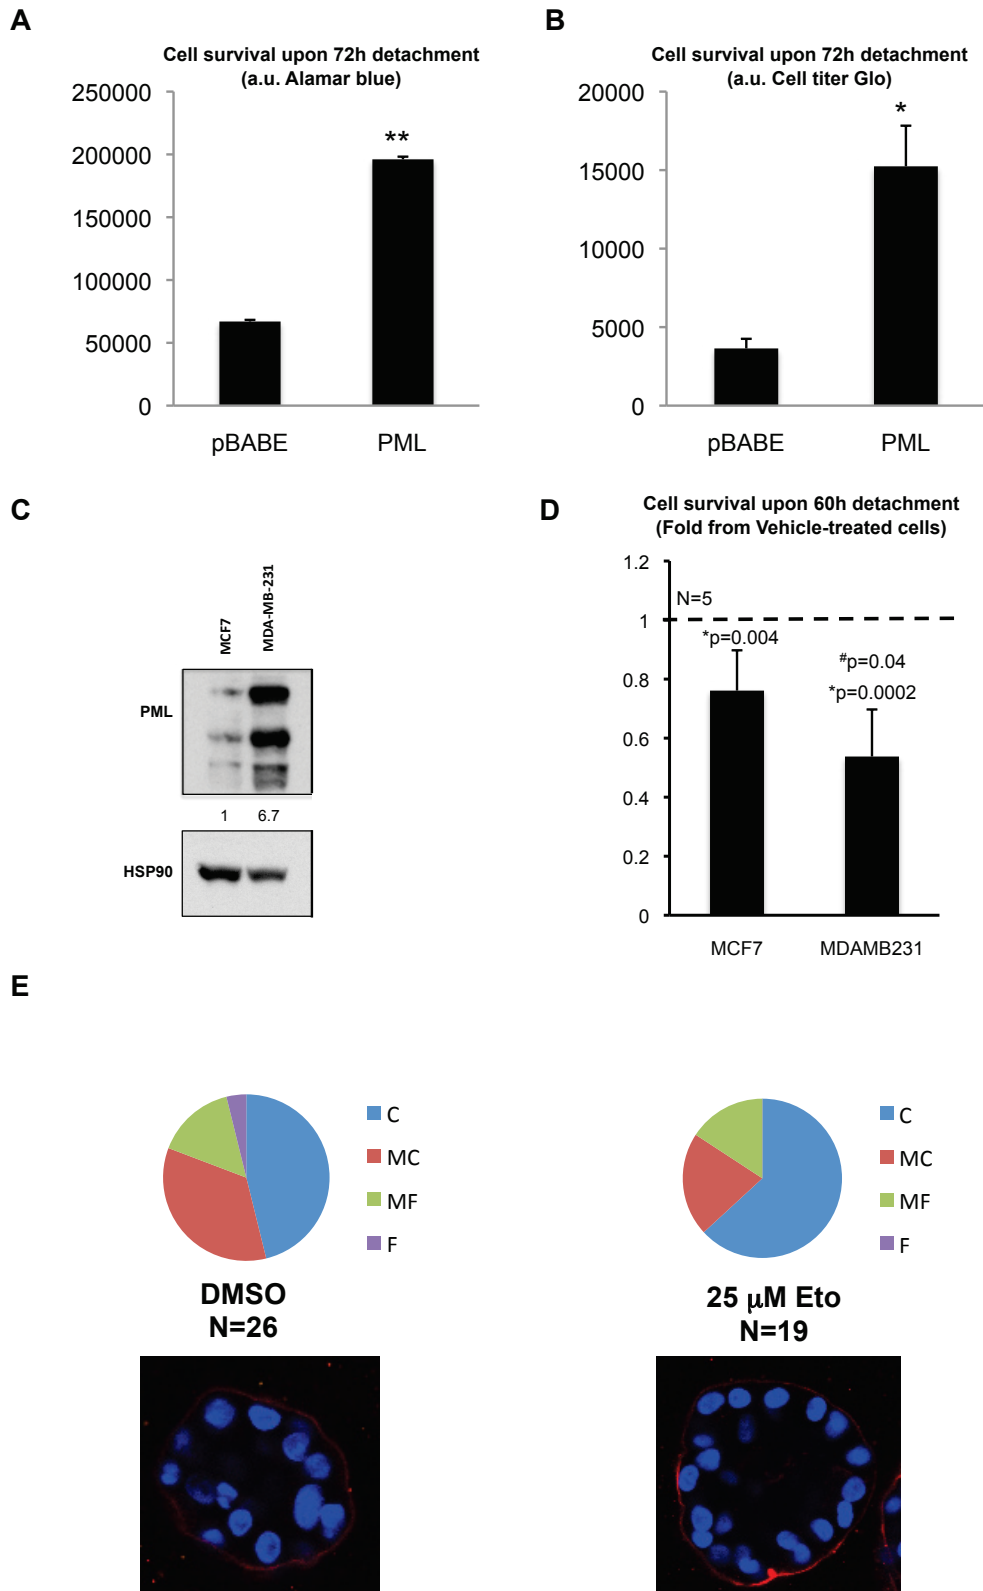

# Supplementary Figure S4

**A**

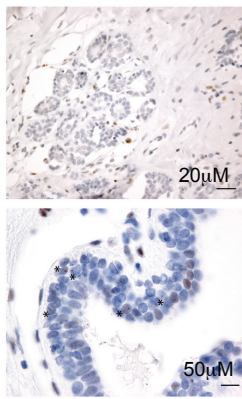

**B**

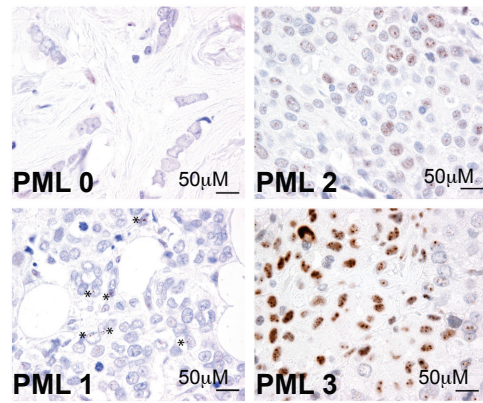

**C**

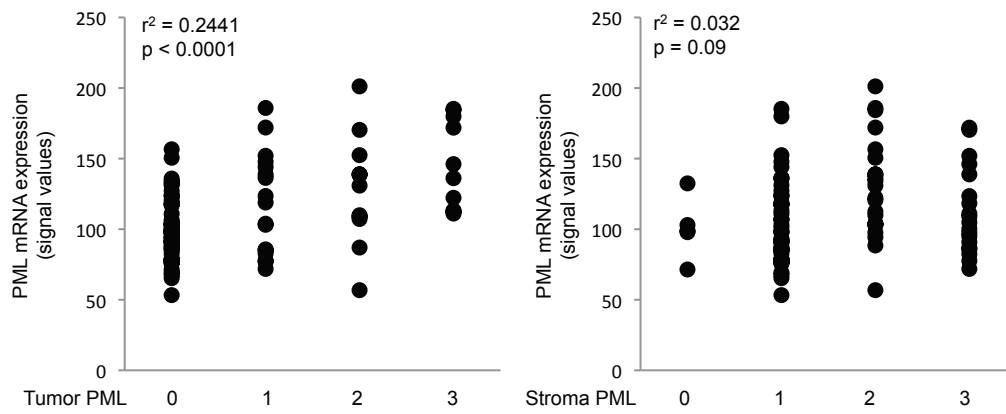



## Supplementary Figure S5

From: Dedeurwaerder S, Desmedt C, Calonne E, Singhal SK et al. DNA methylation profiling reveals a predominant immune component in breast cancers. *EMBO Mol Med* 2011 Dec;3(12):726-41. PMID: 21910250

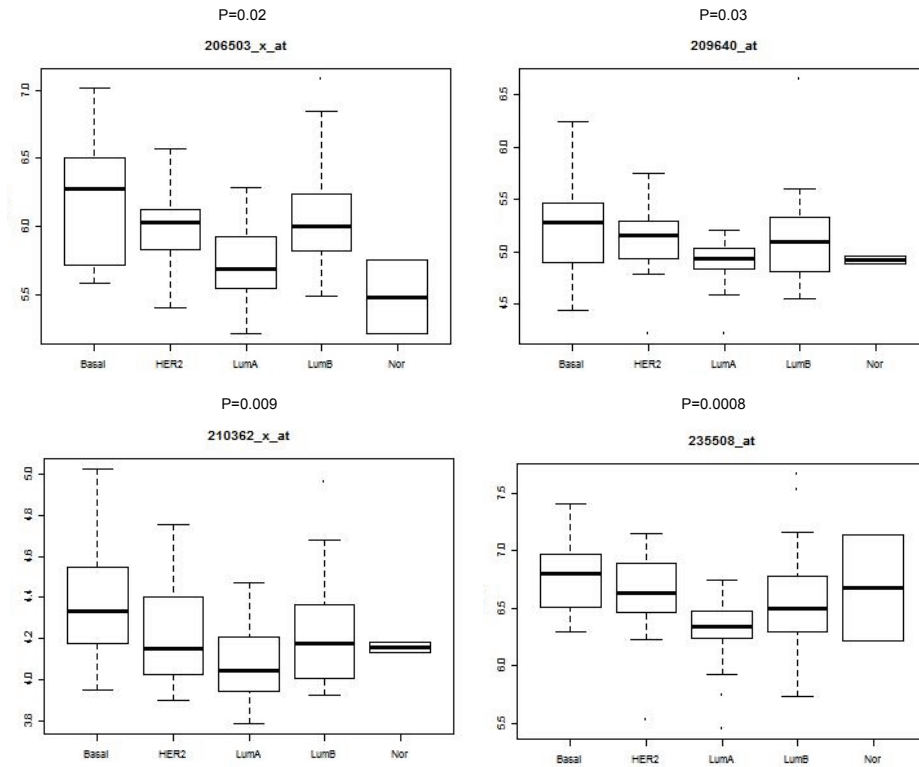

From: Sabatier R, Finetti P, Cervera N, Lambaudie E et al. A gene expression signature identifies two prognostic subgroups of basal breast cancer. *Breast Cancer Res Treat* 2011 Apr;126(2):407-20. PMID: [20490655](https://pubmed.ncbi.nlm.nih.gov/20490655/)

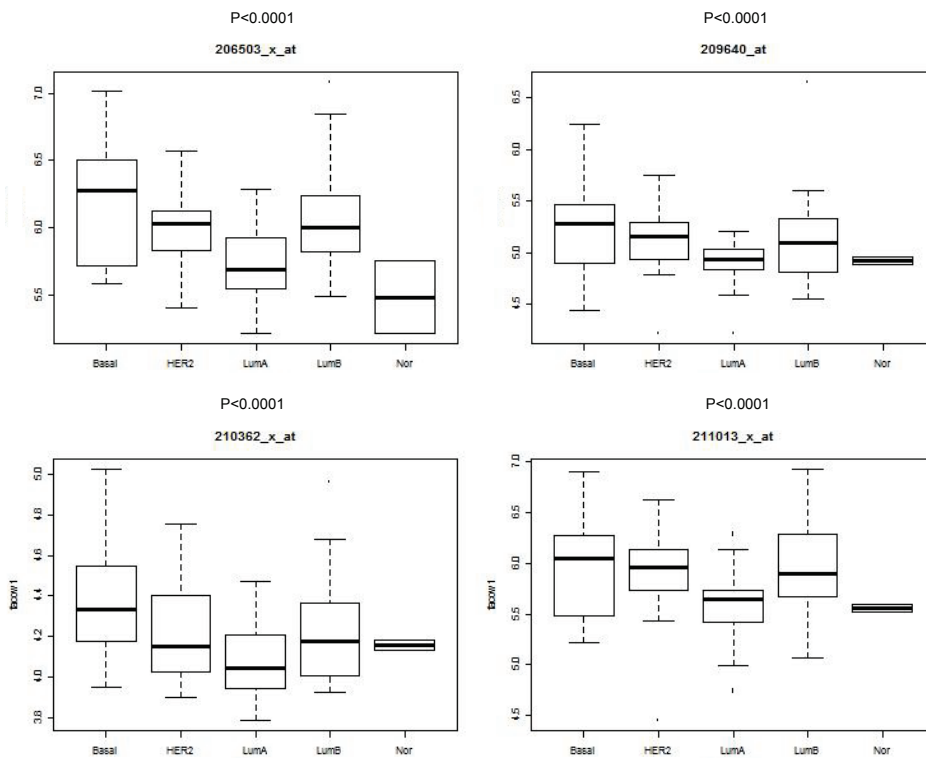

# Supplementary Figure S6

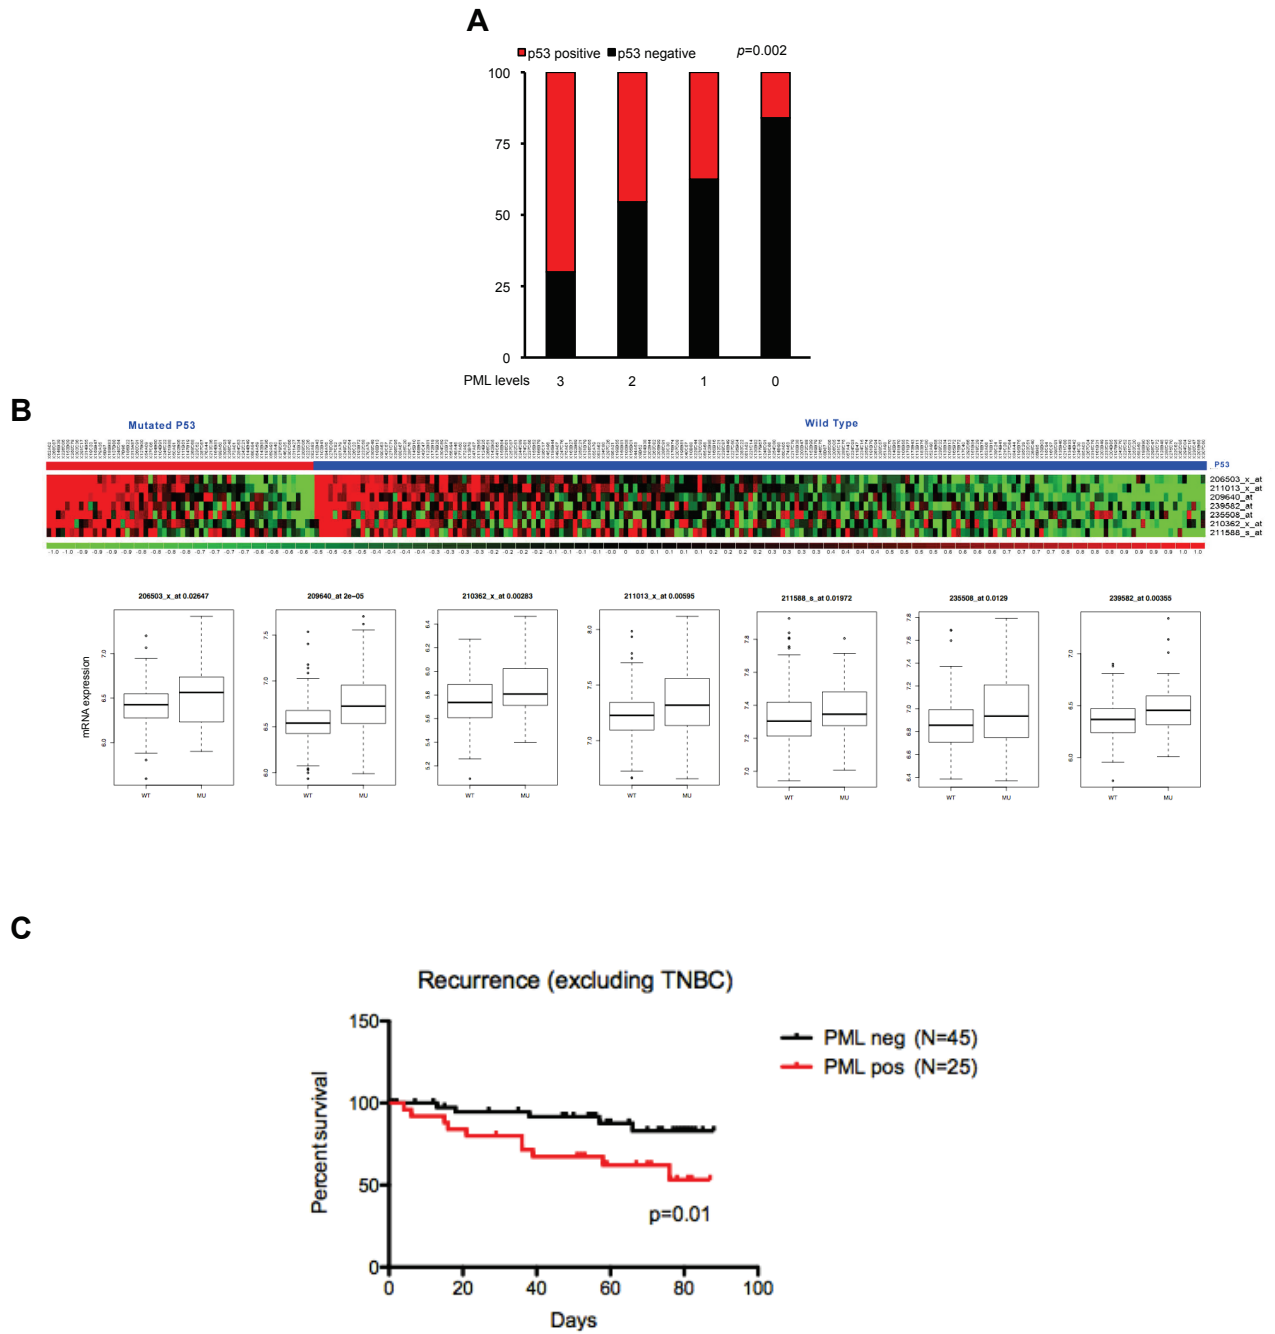



Supplementary Table 1

| Probe                 | Unigene   | Gene symbol                      | Parametric†p-value | FDR   | Permutation†p-value | Geom mean of intensities in class 1-KO | Geom mean of intensities in class 2-WT | Fold-change |
|-----------------------|-----------|----------------------------------|--------------------|-------|---------------------|----------------------------------------|----------------------------------------|-------------|
| 1421818 PM at         | Mm.347398 | Bcl6                             | 0.020              | 0.208 | 0.2                 | 73.3                                   | 278.2                                  | 0.26        |
| 1428942 PM at         | Mm.147226 | Mt2                              | 0.043              | 0.292 | 0.3                 | 73.2                                   | 268.7                                  | 0.27        |
| 1422557 PM s at       | Mm.192991 | Mt1                              | 0.023              | 0.216 | 0.2                 | 447.8                                  | 1499.2                                 | 0.30        |
| 1429203 PM at         | Mm.205196 | 2410076I21Rik                    | 0.000              | 0.013 | 0.1                 | 14.0                                   | 42.2                                   | 0.33        |
| 1450381 PM a at       | Mm.347398 | Bcl6                             | 0.010              | 0.135 | 0.2                 | 30.8                                   | 88.9                                   | 0.35        |
| 1443147 PM at         | Mm.442717 | ---                              | 0.008              | 0.132 | 0.1                 | 20.3                                   | 58.6                                   | 0.35        |
| 1448757 PM at         | Mm.392123 | Pml                              | 0.000              | 0.002 | 0.1                 | 12.4                                   | 35.0                                   | 0.35        |
| 1422925 PM s at       | Mm.202331 | Acot3                            | 0.007              | 0.125 | 0.1                 | 55.2                                   | 152.6                                  | 0.36        |
| 1443422 PM at         | Mm.458646 | 2410089E03Rik                    | 0.000              | 0.029 | 0.1                 | 27.9                                   | 73.0                                   | 0.38        |
| 1436736 PM x at       | Mm.407415 | D0H4S114                         | 0.013              | 0.164 | 0.1                 | 97.2                                   | 230.7                                  | 0.42        |
| 1448700 PM at         | Mm.439721 | G0s2                             | 0.009              | 0.133 | 0.1                 | 367.1                                  | 857.1                                  | 0.43        |
| 1460591 PM at         | Mm.463262 | Esr1                             | 0.000              | 0.006 | 0.1                 | 155.1                                  | 358.7                                  | 0.43        |
| 1456156 PM at         | Mm.259282 | Lepr                             | 0.000              | 0.014 | 0.1                 | 19.1                                   | 43.0                                   | 0.44        |
| AFFX-r2-Bs-phe-5 at   | ---       | ---                              | 0.028              | 0.244 | 0.2                 | 22.2                                   | 49.0                                   | 0.45        |
| 1425644 PM at         | Mm.259282 | Lepr                             | 0.001              | 0.043 | 0.1                 | 12.0                                   | 26.0                                   | 0.46        |
| 1441115 PM at         | ---       | D18Erd232e                       | 0.036              | 0.272 | 0.2                 | 23.9                                   | 51.5                                   | 0.46        |
| 1435465 PM at         | Mm.46675  | Kbtbd11                          | 0.021              | 0.208 | 0.1                 | 18.4                                   | 39.3                                   | 0.47        |
| 1449065 PM at         | Mm.1978   | Acot1 /// LOC100044830           | 0.005              | 0.115 | 0.1                 | 87.4                                   | 186.5                                  | 0.47        |
| 1444518 PM at         | Mm.356689 | Acox1                            | 0.001              | 0.043 | 0.1                 | 98.4                                   | 197.6                                  | 0.50        |
| 1422685 PM at         | Mm.265512 | Exoc4                            | 0.000              | 0.013 | 0.1                 | 33.1                                   | 66.4                                   | 0.50        |
| 1431213 PM a at       | ---       | LOC433762                        | 0.023              | 0.216 | 0.3                 | 29.7                                   | 59.3                                   | 0.50        |
| 1448556 PM at         | Mm.10516  | Prlr                             | 0.006              | 0.119 | 0.1                 | 36.3                                   | 71.3                                   | 0.51        |
| 1450839 PM at         | Mm.407415 | D0H4S114                         | 0.017              | 0.201 | 0.2                 | 180.2                                  | 353.8                                  | 0.51        |
| 1438658 PM a at       | Mm.136736 | S1pr3                            | 0.003              | 0.074 | 0.1                 | 11.5                                   | 22.4                                   | 0.52        |
| 1440230 PM at         | Mm.25317  | Tsku                             | 0.002              | 0.056 | 0.1                 | 44.3                                   | 85.6                                   | 0.52        |
| 1437953 PM at         | Mm.211211 | Prei4                            | 0.011              | 0.149 | 0.1                 | 39.5                                   | 76.3                                   | 0.52        |
| 1422997 PM s at       | Mm.1978   | Acot1 /// Acot2 /// LOC100044830 | 0.002              | 0.056 | 0.1                 | 97.7                                   | 187.8                                  | 0.52        |
| 1452951 PM at         | Mm.458646 | 2410089E03Rik /// LOC100039599   | 0.000              | 0.021 | 0.1                 | 31.6                                   | 60.4                                   | 0.52        |
| 1441547 PM at         | ---       | ---                              | 0.020              | 0.208 | 0.2                 | 37.2                                   | 71.2                                   | 0.52        |
| AFFX-r2-Bs-lys-3 at   | ---       | ---                              | 0.025              | 0.226 | 0.2                 | 20.1                                   | 38.5                                   | 0.52        |
| 1438294 PM at         | Mm.476983 | Atxn1                            | 0.020              | 0.208 | 0.2                 | 82.7                                   | 156.5                                  | 0.53        |
| AFFX-PheX-5 at        | ---       | ---                              | 0.045              | 0.293 | 0.2                 | 24.2                                   | 45.3                                   | 0.53        |
| 1437874 PM s at       | Mm.27816  | Hexb                             | 0.040              | 0.284 | 0.2                 | 99.5                                   | 185.3                                  | 0.54        |
| AFFX-r2-Bs-lys-M at   | ---       | ---                              | 0.009              | 0.132 | 0.1                 | 44.1                                   | 81.9                                   | 0.54        |
| 1443471 PM at         | Mm.440824 | Zbtb20                           | 0.005              | 0.115 | 0.1                 | 110.9                                  | 205.5                                  | 0.54        |
| AFFX-r2-Bs-thr-3 s at | ---       | ---                              | 0.048              | 0.302 | 0.2                 | 132.8                                  | 246.1                                  | 0.54        |
| 1443866 PM at         | Mm.95780  | Lrtm1                            | 0.000              | 0.003 | 0.1                 | 11.8                                   | 21.9                                   | 0.54        |
| 1456310 PM a at       | Mm.10374  | 2610002J02Rik                    | 0.004              | 0.102 | 0.1                 | 19.5                                   | 35.6                                   | 0.55        |
| 1426259 PM at         | Mm.255044 | Pank3                            | 0.003              | 0.074 | 0.1                 | 61.0                                   | 111.2                                  | 0.55        |
| 1455267 PM at         | Mm.89989  | Esrq                             | 0.033              | 0.262 | 0.1                 | 11.5                                   | 20.7                                   | 0.56        |
| 1451190 PM a at       | Mm.29660  | Sbk1                             | 0.004              | 0.098 | 0.1                 | 203.2                                  | 361.2                                  | 0.56        |
| 1460318 PM at         | Mm.17235  | Csrp3                            | 0.001              | 0.043 | 0.1                 | 90.3                                   | 159.4                                  | 0.57        |
| 1434473 PM at         | Mm.25773  | Slc16a5                          | 0.004              | 0.096 | 0.1                 | 33.5                                   | 58.9                                   | 0.57        |
| 1436120 PM at         | Mm.217269 | Setdb2                           | 0.043              | 0.292 | 0.3                 | 105.4                                  | 184.4                                  | 0.57        |
| 1417904 PM at         | Mm.2805   | Dclre1a                          | 0.000              | 0.013 | 0.1                 | 168.9                                  | 294.1                                  | 0.57        |
| 1419749 PM at         | Mm.6979   | Trdmt1                           | 0.007              | 0.125 | 0.1                 | 16.2                                   | 28.2                                   | 0.58        |
| 1446068 PM at         | Mm.188734 | Adk                              | 0.020              | 0.208 | 0.2                 | 66.3                                   | 113.0                                  | 0.59        |
| 1460180 PM at         | Mm.27816  | Hexb                             | 0.002              | 0.068 | 0.1                 | 57.3                                   | 97.5                                   | 0.59        |
| 1460555 PM at         | Mm.217319 | Fam65b                           | 0.015              | 0.182 | 0.2                 | 18.3                                   | 31.1                                   | 0.59        |
| 1455700 PM at         | Mm.255401 | Mterfd3                          | 0.001              | 0.031 | 0.1                 | 26.3                                   | 44.4                                   | 0.59        |
| 1439478 PM at         | ---       | Acot2                            | 0.014              | 0.169 | 0.2                 | 46.2                                   | 77.9                                   | 0.59        |
| 1439293 PM at         | Mm.208955 | BC031353                         | 0.007              | 0.125 | 0.1                 | 148.4                                  | 248.4                                  | 0.60        |
| 1440038 PM at         | ---       | B430007K19Rik                    | 0.004              | 0.103 | 0.1                 | 13.4                                   | 22.3                                   | 0.60        |
| 1425853 PM s at       | Mm.10516  | Prlr                             | 0.002              | 0.069 | 0.1                 | 182.7                                  | 303.0                                  | 0.60        |
| 1440284 PM at         | Mm.31030  | ---                              | 0.008              | 0.132 | 0.2                 | 24.6                                   | 40.9                                   | 0.60        |
| 1452888 PM at         | Mm.284114 | 1110034G24Rik                    | 0.041              | 0.289 | 0.3                 | 75.2                                   | 123.9                                  | 0.61        |
| 1422076 PM at         | Mm.475660 | Acot4                            | 0.046              | 0.293 | 0.3                 | 50.1                                   | 81.4                                   | 0.62        |
| 1447408 PM at         | ---       | ---                              | 0.005              | 0.108 | 0.1                 | 27.9                                   | 44.9                                   | 0.62        |
| 1437397 PM at         | Mm.442298 | Prlr                             | 0.023              | 0.216 | 0.1                 | 74.4                                   | 119.7                                  | 0.62        |
| 1445640 PM at         | ---       | ---                              | 0.000              | 0.013 | 0.1                 | 13.3                                   | 21.4                                   | 0.62        |
| 1429383 PM at         | Mm.368668 | Csnk1a3                          | 0.019              | 0.208 | 0.1                 | 80.3                                   | 127.4                                  | 0.63        |

|         |         |           |                                    |       |       |     |        |        |      |
|---------|---------|-----------|------------------------------------|-------|-------|-----|--------|--------|------|
| 1457770 | PM at   | Mm.270647 | Slc39a14                           | 0.030 | 0.252 | 0.2 | 20.0   | 31.7   | 0.63 |
| 1429656 | PM at   | Mm.26659  | Rhobtb1                            | 0.046 | 0.293 | 0.2 | 100.2  | 156.9  | 0.64 |
| 1439331 | PM at   | ---       | 4932439E07Rik                      | 0.024 | 0.221 | 0.2 | 43.6   | 67.2   | 0.65 |
| 1422230 | PM s at | Mm.389848 | Cyp2a4 /// Cyp2a5 /// LOC100047711 | 0.035 | 0.272 | 0.2 | 2936.7 | 4523.8 | 0.65 |
| 1454799 | PM at   | Mm.271911 | Agpat9                             | 0.003 | 0.074 | 0.1 | 121.7  | 187.0  | 0.65 |
| 1437066 | PM at   | Mm.136238 | Zbtb20                             | 0.001 | 0.043 | 0.1 | 154.7  | 237.8  | 0.65 |
| 1460011 | PM at   | Mm.255246 | Cyp26b1                            | 0.046 | 0.295 | 0.1 | 19.9   | 30.3   | 0.66 |
| 1417769 | PM at   | Mm.18472  | Psmc6                              | 0.003 | 0.074 | 0.1 | 42.9   | 64.3   | 0.67 |
| 1436221 | PM at   | Mm.101743 | Ildr2                              | 0.031 | 0.254 | 0.2 | 69.9   | 104.7  | 0.67 |
| 1421382 | PM at   | ---       | Prir                               | 0.040 | 0.284 | 0.3 | 241.6  | 361.2  | 0.67 |
| 1426452 | PM a at | Mm.389966 | Rab30                              | 0.044 | 0.293 | 0.1 | 54.2   | 80.3   | 0.68 |
| 1428484 | PM at   | Mm.472621 | Osbpl3                             | 0.017 | 0.201 | 0.2 | 18.1   | 26.4   | 0.68 |
| 1436125 | PM at   | Mm.37332  | D16Ert472e                         | 0.044 | 0.293 | 0.2 | 54.7   | 79.9   | 0.68 |
| 1455905 | PM at   | Mm.237103 | 2610507B11Rik                      | 0.011 | 0.149 | 0.1 | 47.7   | 69.4   | 0.69 |
| 1425409 | PM at   | Mm.57350  | Chrna2                             | 0.006 | 0.115 | 0.1 | 18.4   | 26.6   | 0.69 |
| 1421456 | PM at   | Mm.281452 | P2rv1                              | 0.019 | 0.208 | 0.2 | 37.5   | 54.1   | 0.69 |
| 1431220 | PM at   | Mm.441017 | 2810416G20Rik                      | 0.008 | 0.132 | 0.1 | 7.7    | 11.1   | 0.70 |
| 1435092 | PM at   | Mm.12723  | Arl4a                              | 0.030 | 0.252 | 0.1 | 50.2   | 72.0   | 0.70 |
| 1448502 | PM at   | Mm.29161  | Slc16a7                            | 0.021 | 0.208 | 0.2 | 240.5  | 344.9  | 0.70 |
| 1441413 | PM at   | ---       | ---                                | 0.025 | 0.226 | 0.2 | 278.2  | 398.0  | 0.70 |
| 1447839 | PM x at | Mm.1408   | Adm                                | 0.048 | 0.302 | 0.2 | 19.1   | 27.0   | 0.71 |
| 1439397 | PM at   | Mm.4938   | Fmn1                               | 0.039 | 0.284 | 0.3 | 8.0    | 11.2   | 0.71 |
| 1449025 | PM at   | Mm.426079 | Ifit3                              | 0.001 | 0.043 | 0.1 | 52.2   | 72.7   | 0.72 |
| 1418129 | PM at   | Mm.133370 | Dhcr24                             | 0.037 | 0.279 | 0.3 | 503.8  | 697.8  | 0.72 |
| 1425312 | PM s at | Mm.229207 | Cpsf4l                             | 0.006 | 0.115 | 0.1 | 68.6   | 93.1   | 0.74 |
| 1458279 | PM at   | Mm.450309 | ---                                | 0.036 | 0.272 | 0.2 | 20.9   | 28.1   | 0.75 |
| 1430996 | PM at   | Mm.272548 | Etnk1                              | 0.040 | 0.284 | 0.2 | 17.8   | 23.8   | 0.75 |
| 1444396 | PM at   | Mm.293605 | Trp53inp2                          | 0.039 | 0.284 | 0.2 | 44.7   | 57.4   | 0.78 |
| 1422823 | PM at   | Mm.235346 | Eps8 /// LOC632638                 | 0.029 | 0.244 | 0.1 | 12.7   | 15.7   | 0.80 |
| 1416936 | PM at   | Mm.6826   | Aatk                               | 0.040 | 0.284 | 0.2 | 15.1   | 18.8   | 0.80 |
| 1428547 | PM at   | Mm.244235 | Nt5e                               | 0.028 | 0.244 | 0.1 | 22.4   | 27.2   | 0.83 |
| 1438941 | PM x at | Mm.274335 | Ampd2                              | 0.038 | 0.283 | 0.2 | 164.7  | 128.0  | 1.29 |
| 1455940 | PM x at | Mm.335454 | Wdr6                               | 0.010 | 0.135 | 0.1 | 220.3  | 165.0  | 1.33 |
| 1452769 | PM at   | Mm.156771 | Rnf145                             | 0.009 | 0.132 | 0.1 | 409.2  | 299.6  | 1.37 |
| 1452975 | PM at   | Mm.29125  | Aqxt2l1                            | 0.020 | 0.208 | 0.1 | 1816.1 | 1326.4 | 1.37 |
| 1444296 | PM a at | Mm.297023 | Serpina4-ps1                       | 0.009 | 0.133 | 0.1 | 809.0  | 577.4  | 1.40 |
| 1416256 | PM a at | Mm.273538 | Tubb5                              | 0.031 | 0.252 | 0.2 | 493.4  | 350.5  | 1.41 |
| 1451903 | PM at   | Mm.105278 | Kynu                               | 0.042 | 0.290 | 0.2 | 31.5   | 22.3   | 1.41 |
| 1448092 | PM x at | Mm.297023 | Serpina4-ps1                       | 0.009 | 0.132 | 0.1 | 1120.6 | 785.1  | 1.43 |
| 1438619 | PM x at | Mm.399660 | Zdhhc14                            | 0.022 | 0.212 | 0.2 | 110.4  | 76.3   | 1.45 |
| 1451803 | PM a at | Mm.15607  | Veqfb                              | 0.000 | 0.029 | 0.1 | 66.9   | 46.0   | 1.45 |
| 1448261 | PM at   | Mm.35605  | Cdh1                               | 0.033 | 0.262 | 0.1 | 209.4  | 143.7  | 1.46 |
| 1458356 | PM at   | Mm.396244 | ---                                | 0.046 | 0.293 | 0.2 | 53.2   | 36.1   | 1.47 |
| 1415904 | PM at   | Mm.1514   | Lpl                                | 0.025 | 0.226 | 0.2 | 147.7  | 99.3   | 1.49 |
| 1437094 | PM x at | Mm.79127  | Dnaic1                             | 0.013 | 0.163 | 0.1 | 32.7   | 21.9   | 1.49 |
| 1418209 | PM a at | Mm.271744 | Pfn2                               | 0.019 | 0.208 | 0.2 | 72.2   | 47.9   | 1.51 |
| 1416066 | PM at   | Mm.210676 | Cd9                                | 0.032 | 0.260 | 0.2 | 238.9  | 158.7  | 1.51 |
| 1449385 | PM at   | Mm.26719  | Hsd17b6                            | 0.000 | 0.029 | 0.1 | 3484.3 | 2288.2 | 1.52 |
| 1418492 | PM at   | Mm.25760  | Grem2                              | 0.006 | 0.119 | 0.1 | 188.7  | 119.2  | 1.58 |
| 1445108 | PM at   | ---       | ---                                | 0.014 | 0.169 | 0.2 | 19.3   | 12.1   | 1.60 |
| 1435216 | PM a at | Mm.330116 | Odf2                               | 0.006 | 0.119 | 0.1 | 32.6   | 20.0   | 1.63 |
| 1432075 | PM a at | Mm.42257  | Tekt1                              | 0.020 | 0.208 | 0.2 | 28.4   | 17.3   | 1.64 |
| 1437140 | PM at   | Mm.440423 | 4930412F15Rik                      | 0.024 | 0.221 | 0.2 | 49.6   | 29.7   | 1.67 |
| 1422947 | PM at   | Mm.144300 | ---                                | 0.026 | 0.226 | 0.2 | 20.1   | 11.6   | 1.73 |
| 1427347 | PM s at | Mm.469917 | Tubb2a                             | 0.002 | 0.056 | 0.1 | 188.7  | 109.1  | 1.73 |
| 1422735 | PM at   | Mm.44235  | Foxq1                              | 0.031 | 0.252 | 0.2 | 62.8   | 36.3   | 1.73 |
| 1437754 | PM at   | Mm.332837 | Kpna7                              | 0.012 | 0.159 | 0.2 | 15.7   | 8.4    | 1.88 |
| 1420722 | PM at   | Mm.21806  | Elovl3                             | 0.007 | 0.125 | 0.1 | 1092.4 | 580.0  | 1.88 |
| 1418210 | PM at   | Mm.271744 | Pfn2                               | 0.000 | 0.026 | 0.1 | 54.2   | 27.7   | 1.95 |
| 1444297 | PM at   | Mm.297023 | Serpina4-ps1                       | 0.001 | 0.043 | 0.1 | 467.9  | 239.4  | 1.95 |
| 1428294 | PM at   | Mm.17519  | Zfp259                             | 0.009 | 0.132 | 0.1 | 123.4  | 63.0   | 1.96 |
| 1423600 | PM a at | Mm.2215   | Tcof1                              | 0.044 | 0.293 | 0.3 | 54.8   | 27.8   | 1.97 |
| 1445633 | PM at   | ---       | ---                                | 0.038 | 0.283 | 0.3 | 62.7   | 28.1   | 2.23 |
| 1457282 | PM x at | Mm.284306 | Subgcp5                            | 0.006 | 0.115 | 0.2 | 67.8   | 29.9   | 2.27 |
| 1448724 | PM at   | Mm.4592   | Cish                               | 0.010 | 0.135 | 0.1 | 126.2  | 52.7   | 2.39 |
| 1427820 | PM at   | Mm.466733 | ---                                | 0.002 | 0.056 | 0.1 | 215.3  | 71.0   | 3.03 |

Supplementary Table 2

| Matrix name                        | Yes (sites/Kb) | No (sites/Kb) | Yes/No        | P-value       | Matched promoters p-value | From        | To         |
|------------------------------------|----------------|---------------|---------------|---------------|---------------------------|-------------|------------|
| <a href="#">V\$BACH2_01</a>        | 0.1944         | 0             | inf           | 7.11E-06      | 6.47E-06                  | -400        | 100        |
| <a href="#">V\$NFAT_Q4_01</a>      | 1.2442         | 0.4808        | 2.588         | 1.03E-05      | 0.002                     | -500        | -200       |
| <a href="#">V\$AP1_Q4_01</a>       | 0.4277         | 0.0801        | 5.3377        | 6.76E-05      | 2.52E-05                  | -200        | 100        |
| <a href="#">V\$ZIC3_01</a>         | 0.972          | 0.4167        | 2.3329        | 3.52E-04      | 0.0119                    | -300        | 0          |
| <a href="#">V\$LUN1_01</a>         | 0.2333         | 0.024         | 9.7049        | 3.73E-04      | 3.28E-04                  | -500        | -200       |
| <a href="#">V\$AP1_Q2_01</a>       | 0.1944         | 0.016         | 12.131        | 6.49E-04      | 6.06E-04                  | -400        | 100        |
| <a href="#">V\$IPF1_Q4_01</a>      | 0.5055         | 0.1683        | 3.0039        | 0.0014        | 0.0802                    | -500        | -100       |
| <a href="#">V\$DBP_Q6</a>          | 0.7776         | 0.3365        | 2.3107        | 0.0014        | 4.80E-04                  | -400        | -100       |
| <a href="#">V\$CRX_Q4</a>          | 0.3111         | 0.0681        | 4.567         | 0.0015        | 0.0045                    | -500        | -200       |
| <a href="#">V\$FXR_Q3</a>          | 0.3111         | 0.0681        | 4.567         | 0.0015        | 0.0076                    | -500        | -200       |
| <a href="#">V\$MAZ_Q6</a>          | 0.5443         | 0.1923        | 2.8306        | 0.0015        | 0.0112                    | -300        | 0          |
| <a href="#">V\$BCL6_Q3</a>         | 0.972          | 0.4688        | 2.0737        | 0.0015        | 0.0048                    | -300        | 0          |
| <a href="#">V\$CKROX_Q2</a>        | 0.4666         | 0.1482        | 3.1475        | 0.0015        | 0.0199                    | -200        | 100        |
| <a href="#">V\$EBF_Q6</a>          | 0.8554         | 0.3966        | 2.1566        | 0.0018        | 0.0192                    | -400        | -100       |
| <a href="#">V\$SREBP_Q6</a>        | 1.3997         | 0.7973        | 1.7557        | 0.0023        | 0.0575                    | -300        | 0          |
| <a href="#">V\$HNF4ALPHA_Q6</a>    | 1.0109         | 0.5208        | 1.941         | 0.0027        | 0.0157                    | -500        | -200       |
| <a href="#">V\$NKX25_Q5</a>        | 1.4386         | 0.8373        | 1.7181        | 0.0027        | 3.42E-04                  | -500        | -200       |
| <a href="#">V\$CEBP_Q2_01</a>      | 1.0887         | 0.5809        | 1.874         | 0.003         | 0.0167                    | -500        | -100       |
| <a href="#">V\$TAXCREB_01</a>      | 0.5832         | 0.2364        | 2.4673        | 0.0032        | 0.0015                    | -300        | 0          |
| <a href="#">V\$E2F_Q6_01</a>       | 0.1944         | 0.028         | 6.9321        | 0.0032        | 0.0031                    | -500        | 100        |
| <a href="#">V\$HMGY_Q6</a>         | 0.6999         | 0.3125        | 2.2396        | 0.0032        | 8.81E-04                  | -500        | -200       |
| <a href="#">V\$SREBP_Q3</a>        | 2.1385         | 1.4022        | 1.5251        | 0.0034        | 0.0506                    | -300        | 0          |
| <a href="#">V\$NFY_Q6_01</a>       | 0.4277         | 0.1482        | 2.8852        | 0.0041        | 0.0041                    | -200        | 100        |
| <a href="#">V\$CEBPDELTA_Q6</a>    | 0.3111         | 0.0841        | 3.6971        | 0.0041        | 0.0034                    | -500        | 0          |
| <a href="#">V\$STAT1_01</a>        | 0.2333         | 0.0481        | 4.8524        | 0.0046        | 0.0147                    | -500        | -100       |
| <a href="#">V\$SMAD3_Q6</a>        | 1.2831         | 0.7492        | 1.7126        | 0.0046        | 0.0988                    | -300        | 0          |
| <a href="#">V\$PAX5_Q2</a>         | 0.1944         | 0.0321        | 6.0656        | 0.0048        | 0.0205                    | -400        | -100       |
| <a href="#">V\$ETF_Q6</a>          | 3.8882         | 2.9087        | 1.3368        | 0.0049        | 0.2762                    | -400        | 0          |
| <a href="#">V\$AP2_Q6</a>          | 0.2722         | 0.0681        | 3.9961        | 0.0051        | 0.0098                    | -400        | 100        |
| <a href="#">V\$DR4_Q2</a>          | 0.3888         | 0.1322        | 2.9409        | 0.0054        | 0.1418                    | -200        | 100        |
| <a href="#">V\$TCF11_01</a>        | 0.8943         | 0.4728        | 1.8916        | 0.006         | 0.0073                    | -200        | 100        |
| <a href="#">V\$AP2ALPHA_01</a>     | 0.2333         | 0.0521        | 4.4792        | 0.0062        | 0.0358                    | -200        | 100        |
| <a href="#">V\$HNF3_Q6_01</a>      | 0.2333         | 0.0521        | 4.4792        | 0.0062        | 0.0455                    | -400        | 0          |
| <a href="#">V\$HNF3B_01</a>        | 0.6221         | 0.2845        | 2.187         | 0.0064        | 0.0135                    | -200        | 100        |
| <b><a href="#">V\$PPARA_01</a></b> | <b>0.2722</b>  | <b>0.0721</b> | <b>3.7741</b> | <b>0.0066</b> | <b>0.0126</b>             | <b>-200</b> | <b>100</b> |
| <a href="#">V\$ZF5_B</a>           | 0.2722         | 0.0721        | 3.7741        | 0.0066        | 0.0404                    | -200        | 100        |
| <a href="#">V\$NFY_01</a>          | 0.661          | 0.3125        | 2.1152        | 0.0067        | 0.0032                    | -200        | 100        |
| <a href="#">V\$MAF_Q6_01</a>       | 0.1944         | 0.0361        | 5.3916        | 0.0069        | 0.0067                    | -400        | -100       |
| <a href="#">V\$E2F_Q3</a>          | 0.1944         | 0.0361        | 5.3916        | 0.0069        | 0.0275                    | -400        | 100        |
| <a href="#">V\$AP2_Q6_01</a>       | 0.1944         | 0.0361        | 5.3916        | 0.0069        | 0.0046                    | -500        | -200       |
| <a href="#">V\$NF1_Q6_01</a>       | 0.1944         | 0.0361        | 5.3916        | 0.0069        | 0.0275                    | -300        | 100        |
| <a href="#">V\$DR1_Q3</a>          | 0.3111         | 0.0962        | 3.235         | 0.0079        | 0.017                     | -400        | 0          |
| <a href="#">V\$CEBPA_01</a>        | 0.2333         | 0.0561        | 4.1592        | 0.0081        | 0.0057                    | -400        | -100       |

Supplementary Table 3

| Sample name | GEO accession id          | TNM Stage | Stage group | Time of followup | Event | Type of recurrence | p53 IHC | Array profile subtype | Tumor grade | ER IHC | PR IHC | HER2 IHC | PML IHC | PML mRNA (array a.u.) |
|-------------|---------------------------|-----------|-------------|------------------|-------|--------------------|---------|-----------------------|-------------|--------|--------|----------|---------|-----------------------|
| B1          | <a href="#">GSM125026</a> | T2 N0     | IIA         | 80               | 0     | None               | n       | ER LG                 | I           | p      | p      | n        |         | 117.16                |
| B10         | <a href="#">GSM125033</a> | T2 N0     | IIA         | 82               | 0     | None               | n       | HER                   | II          | p      | p      | p        | 1       | 185.89                |
| B11         | <a href="#">GSM125034</a> | T1c N0    | I           | 75               | 0     | None               | p       | TN                    | III         | n      | n      | p        | 3       | 179.9                 |
| B12         | <a href="#">GSM125035</a> | T2 N2a    | IIIA        | 36               | 1     | Local              | n       | ER HG                 | II          | p      | p      | n        | 1       | 118.88                |
| B13         | <a href="#">GSM125036</a> | T2 N0     | IIA         | 52               | 0     | None               | n       | ER HG                 | III         | p      | n      | p        | 1       | 85.68                 |
| B14         | <a href="#">GSM125037</a> | T2 N0     | IIA         | 81               | 0     | None               | p       | HER                   | II          | n      | n      | p        | 3       | 112.48                |
| B15         | <a href="#">GSM125038</a> | T2 N0     | IIA         | 59               | 0     | None               | n       | ER LG                 | II          | p      | p      | p        | 0       | 98.13                 |
| B16         | <a href="#">GSM125039</a> | T1c N1a   | IIA         | 1                | 0     | None               | n       | HER                   | III         | p      | p      | p        | 0       | 124.05                |
| B17         | <a href="#">GSM125040</a> | T1c N3    | IIIC        | 83               | 0     | None               | n       | HER                   | II          | p      | p      | p        | 0       | 91.21                 |
| B18         | <a href="#">GSM125041</a> | T1c N2a   | IIIA        | 85               | 0     | None               | u       | ER LG                 | II          | p      | n      | n        |         | 125.1                 |
| B19         | <a href="#">GSM125042</a> | T2 N2a    | IIIA        | 11               | 0     | None               | n       | ER HG                 | II          | p      | p      | n        |         | 119.46                |
| B2          | <a href="#">GSM125027</a> | T1b N0    | I           | 78               | 0     | None               | n       | ER HG                 | III         | p      | p      | p        | 0       | 85.09                 |
| B20         | <a href="#">GSM125043</a> | T1b N0    | I           | 2                | 0     | None               | n       | ER LG                 | I           | p      | p      | n        | 0       | 110.88                |
| B21         | <a href="#">GSM125044</a> | T2 N0     | IIA         | 18               | 1     | Distant            | p       | TN                    | III         | n      | n      | n        | 2       | 56.79                 |
| B22         | <a href="#">GSM125045</a> | T2 N0     | IIA         | 70               | 0     | None               | n       | ER LG                 | I           | p      | p      | n        | 0       | 65.28                 |
| B23         | <a href="#">GSM125046</a> | T1c N2a   | IIIA        | 83               | 0     | None               | n       | ER HG                 | II          | p      | p      | n        |         | 201.1                 |
| B24         | <a href="#">GSM125047</a> | T2 N2a    | IIIA        | 74               | 0     | None               | n       | ER LG                 | I           | p      | n      | n        | 0       | 127.24                |
| B25         | <a href="#">GSM125048</a> | T1c N0    | I           | 87               | 0     | None               | p       | HER                   | III         | n      | n      | p        | 1       | 123.51                |
| B26         | <a href="#">GSM125049</a> | T1c N0    | I           | 86               | 0     | None               | n       | ER HG                 | I           | p      | p      | n        |         | 67.4                  |
| B28         | <a href="#">GSM125050</a> | T3 N2a    | IIIA        | 1                | 0     | None               | n       | HER                   | II          | p      | p      | n        | 0       | 106.58                |
| B29         |                           | T2 N1mi   | IIB         | 58               | 1     | Local              | n       | ER LG                 | I           | p      | p      | n        | 2       | 138.64                |
| B3          | <a href="#">GSM125028</a> | T1c N0    | I           | 78               | 0     | None               | n       | ER LG                 | I           | p      | p      | p        |         | 77.91                 |
| B30         | <a href="#">GSM125051</a> | T2 N2a    | IIIA        | 80               | 0     | None               | n       | ER HG                 | III         | p      | p      | n        | 0       | 134.05                |
| B31         | <a href="#">GSM125052</a> | T1b N0    | I           | 78               | 0     | None               | n       | ER LG                 | II          | p      | p      | n        | 2       | 107.23                |
| B33         | <a href="#">GSM125054</a> | T1c N0    | I           | 56               | 0     | None               | n       | TN/ BRCA1             | III         | n      | n      | n        | 0       | 86.17                 |
| B34         | <a href="#">GSM125055</a> | T2 N1a    | IIB         | 70               | 0     | None               | n       | ER LG                 | I           | p      | p      | n        | 1       | 82.82                 |
| B35         | <a href="#">GSM125056</a> | T2 N1a    | IIB         | 83               | 0     | None               | n       | TN                    | III         | n      | n      | n        | 1       | 138.8                 |
| B36         |                           | T2 N1mi   | IIB         | 16               | 0     | None               | n       | ER LG                 | I           | p      | p      | n        |         | 99.05                 |
| B37         | <a href="#">GSM125057</a> | T4 N1a    | IIB         | 14               | 1     | Distant            | n       | HER                   | III         | n      | n      | n        | 0       | 87.28                 |
| B38         | <a href="#">GSM125058</a> | T2 N0     | IIA         | 75               | 0     | None               | p       | TN                    | III         | n      | n      | n        | 1       | 144.07                |
| B39         | <a href="#">GSM125059</a> | T2 N0     | IIA         | 77               | 0     | None               | n       | ER LG                 | II          | p      | n      | n        |         | 110.7                 |
| B4          | <a href="#">GSM125029</a> | T1c N1a   | IIA         | 51               | 0     | None               | n       | HER                   | III         | p      | p      | p        | 2       | 109.89                |
| B40         | <a href="#">GSM125060</a> | T1c N0    | I           | 15               | 0     | None               | n       | ER LG                 | I           | p      | p      | n        | 0       | 150.61                |
| B41         | <a href="#">GSM125061</a> | T1c N3    | IIIC        | 73               | 0     | None               | n       | ER HG                 | III         | p      | p      | n        | 0       | 99                    |
| B43         | <a href="#">GSM125062</a> | T2 N0     | IIA         | 60               | 0     | None               | n       | ER HG                 | II          | p      | p      | n        | 0       | 78.38                 |
| B44         | <a href="#">GSM125063</a> | T1c N2a   | IIIA        | 85               | 0     | None               | n       | ER HG                 | III         | p      | p      | n        |         | 122.46                |
| B45         | <a href="#">GSM125064</a> | T1c N0    | I           | 77               | 0     | None               | p       | TN                    | III         | n      | n      | n        | 3       | 146.1                 |
| B47         | <a href="#">GSM125065</a> | T2 N2a    | IIIA        | 81               | 0     | None               | n       | ER HG                 | II          | p      | p      | n        |         | 79.26                 |
| B5          | <a href="#">GSM125030</a> | T2 N1a    | IIB         | 6                | 1     | Distant            | n       | ER LG                 | II          | p      | p      | n        | 1       | 151.99                |
| B50         | <a href="#">GSM125103</a> | T1c N2a   | IIIA        | 0                | 0     | None               | n       | ER HG                 | III         | p      | n      | n        | 0       | 90.88                 |
| B51         | <a href="#">GSM125066</a> | T2 N1a    | IIB         | 50               | 1     | Distant            | p       | HER                   | III         | n      | n      | p        |         | 141.34                |
| B52         | <a href="#">GSM125067</a> | T1c N0    | I           | 81               | 0     | None               | n       | ER LG                 | I           | p      | p      | p        | 0       | 120.54                |
| B53         | <a href="#">GSM125068</a> | T1c N0    | I           | 57               | 0     | None               | n       | HER                   | III         | n      | n      | n        | 3       | 184.34                |
| B54         | <a href="#">GSM125069</a> | T1c N2a   | IIIA        | 48               | 0     | None               | n       | HER                   | II          | p      | p      | p        | 0       | 135.88                |
| B55         | <a href="#">GSM125070</a> | T2 N2a    | IIIA        | 58               | 0     | None               | p       | HER                   | III         | n      | n      | p        | 1       | 172.01                |
| B57         | <a href="#">GSM125071</a> | T1c N0    | I           | 21               | 1     | Distant            | p       | TN                    | III         | n      | n      | n        | 3       | 136.13                |
| B61         | <a href="#">GSM125072</a> | T2 N1a    | IIB         | 66               | 1     | Distant            | n       | HER                   | II          | p      | p      | p        | 0       | 77.99                 |
| B63         | <a href="#">GSM125073</a> | T2 N0     | IIA         | 77               | 0     | None               | p       | HER                   | III         | n      | n      | p        | 0       | 103.53                |
| B65         | <a href="#">GSM125074</a> | T1c N1a   | IIA         | 82               | 0     | None               | n       | ER LG                 | I           | p      | p      | n        | 0       | 102.96                |
| B66         | <a href="#">GSM125075</a> | T1c N0    | I           | 35               | 0     | None               | n       | ER LG                 | I           | p      | p      | n        | 0       | 82.41                 |
| B67         | <a href="#">GSM125076</a> | T1c N0    | I           | 71               | 0     | None               | n       | ER HG                 | III         | p      | p      | p        | 3       | 171.93                |
| B68         | <a href="#">GSM125077</a> | T2 N2a    | IIIA        | 38               | 1     | Distant            | n       | HER                   | II          | p      | p      | p        | 0       | 75.85                 |
| B7          | <a href="#">GSM125031</a> | T1b N0    | I           | 85               | 0     | None               | n       | ER HG                 | II          | p      | p      | n        | 0       | 97.76                 |
| B70         | <a href="#">GSM125078</a> | T2 N3     | IIIC        | 36               | 1     | Distant            | n       | HER                   | II          | p      | p      | p        | 2       | 170.37                |
| B71         | <a href="#">GSM125079</a> | T1c N1a   | IIA         | 55               | 0     | None               | n       | ER LG                 | I           | p      | p      | n        | 0       | 69.32                 |
| B72         | <a href="#">GSM125080</a> | T2 N1a    | IIB         | 2                | 1     | Distant            | n       | ER HG                 | III         | p      | p      | n        |         | 125.99                |

|      |           |            |      |    |   |         |   |           |     |   |   |   |   |        |
|------|-----------|------------|------|----|---|---------|---|-----------|-----|---|---|---|---|--------|
| B73  | GSM125081 | T2 N1a     | IIB  | 76 | 0 | None    | p | ER LG     | III | p | p | n |   | 100.81 |
| B74  | GSM125082 | T2 N1a     | IIB  | 88 | 0 | None    | n | ER HG     | III | p | p | n | 0 | 71.44  |
| B75  | GSM125083 | T1c N2a    | IIIA | 47 | 0 | None    | n | ER LG     | I   | p | p | n | 0 | 97.6   |
| B76  | GSM125084 | T1c N1a    | IIA  | 83 | 0 | None    | n | ER HG     | I   | p | p | n | 0 | 94.31  |
| B77  | GSM125085 | T1c N0     | I    | 54 | 0 | None    | p | HER       | III | p | p | p | 0 | 118.3  |
| B78  | GSM125086 | T1c N0     | I    | 79 | 0 | None    | n | ER LG     | I   | p | n | n | 0 | 88.45  |
| B79  | GSM125087 | T2 N2a     | IIIA | 15 | 1 | Distant | p | HER       | II  | n | n | p | 2 | 138.96 |
| B8   | GSM125032 | T1b N0     | I    | 73 | 0 | None    | n | ER LG     | I   | p | p | n |   | 106.57 |
| B80  | GSM125088 | T2 N2a     | IIIA | 76 | 1 | Distant | p | ER HG     | III | p | p | n | 2 | 152.44 |
| B81  | GSM125089 | T2 N1a     | IIB  | 18 | 1 | Distant | n | ER HG     | III | p | p | n | 0 | 104.79 |
| B82  |           | T1c N1mi   | IIA  | 12 | 0 | None    | n | ER LG     | II  | p | p | n | 0 | 117.19 |
| B84  | GSM125090 | T2 N3      | IIIC | 7  | 0 | None    | n | HER       | III | p | p | p | 0 | 117.58 |
| B85  | GSM125091 | T1c N0     | I    | 76 | 0 | None    | n | ER LG     | II  | p | p | n | 1 | 103.87 |
| B86  | GSM125092 | T1c N1a    | IIA  | 81 | 0 | None    | n | ER LG     | I   | p | p | n | 0 | 67.69  |
| B88  | GSM125093 | T2 N0      | IIA  | 83 | 0 | None    | n | ER LG     | I   | p | p | n |   | 97.78  |
| B89  | GSM125094 | T1c N2a    | IIIA | 54 | 0 | None    | n | ER LG     | I   | p | p | n | 0 | 76.17  |
| B90  | GSM125095 | T1c N0     | I    | 79 | 0 | None    | n | ER LG     | I   | p | p | n | 0 | 90.33  |
| B91  | GSM125096 | T1c N0     | I    | 74 | 0 | None    | n | ER LG     | I   | p | p | n | 0 | 79.07  |
| B93  | GSM125097 | T1b N0     | I    | 81 | 0 | None    | n | ER LG     | I   | p | n | n |   | 78.82  |
| B94  | GSM125098 | T1b N0     | I    | 81 | 0 | None    | n | ER LG     | I   | p | p | n | 0 | 97.87  |
| B95  | GSM125099 | T2 N0      | IIA  | 76 | 0 | None    | n | ER LG     | II  | p | p | n | 2 | 108.96 |
| B96  | GSM125100 | T1c N0     | I    | 65 | 0 | None    | n | ER HG     | II  | p | p | n | 0 | 92.15  |
| B97  | GSM125101 | T1c N0     | I    | 83 | 0 | None    | n | ER LG     | I   | p | p | n |   | 119.98 |
| B98  | GSM125102 | T1c N0     | I    | 35 | 0 | None    | n | ER LG     | II  | p | p | n | 0 | 103.06 |
| C114 | GSM124995 | T1b N0     | I    | 38 | 0 | None    | p | TN        | III | n | n | n |   | 103.42 |
| C115 | GSM124996 | T2 N0      | IIA  | 29 | 0 | None    | p | HER       | III | n | n | p | 1 | 71.84  |
| C116 | GSM124997 | T2 N0      | IIA  | 60 | 0 | None    | p | TN        | III | n | n | n | 0 | 93.38  |
| C118 | GSM124998 | T2 N1a     | IIB  | 62 | 0 | None    | p | TN        | III | n | n | n |   | 98.68  |
| C119 | GSM124999 | T2 N1a     | IIB  | 16 | 1 | Distant | p | HER       | III | n | n | p | 1 | 77.15  |
| C120 | GSM125000 | T1c N1a    | IIA  | 64 | 0 | None    | n | TN        | III | n | n | u |   | 82.03  |
| C121 | GSM125001 | T2 N0      | IIA  | 67 | 0 | None    | n | HER       | III | n | n | p | 2 | 201.18 |
| C122 | GSM125002 | T2 N1a     | IIB  | 27 | 1 | Distant | n | HER       | II  | n | n | p |   | 105.43 |
| C123 | GSM125003 | T2 N1a     | IIB  | 48 | 1 | Distant | p | TN        | III | n | n | n | 3 | 113.27 |
| C124 |           | Recurrence |      |    |   |         | n | TN        | III | n | n | n | 1 | 147.72 |
| C125 | GSM125004 | T2 N0      | IIA  | 62 | 0 | None    | p | TN        | III | n | n | n | 0 | 94.89  |
| C126 | GSM125005 | T2 N2a     | IIIA | 24 | 1 | Distant | p | TN        | III | n | n | n | 3 | 185.26 |
| C128 | GSM125006 | T1c N0     | I    | 52 | 0 | None    | u | TN        | II  | n | n | n |   | 80.2   |
| C130 | GSM125007 | T2 N3 M1   | IV   | 2  | 1 | Distant | n | TN        | III | n | n | n |   | 122.54 |
| C131 | GSM125008 | T2 N0      | IIA  | 53 | 0 | None    | n | TN/ BRCA2 | III | n | n | n |   | 89.37  |
| C132 | GSM125009 | T1b N0     | I    | 54 | 0 | None    | p | TN        | III | n | n | n |   | 99.39  |
| C133 | GSM125010 | T1b N0     | I    | 51 | 0 | None    | p | TN        | III | n | n | n |   | 82.52  |
| C134 | GSM125011 | T2 N0      | IIA  | 48 | 0 | None    | p | TN        | III | n | n | n |   | 109.72 |
| C135 | GSM125012 | T1b N0     | I    | 52 | 0 | None    | p | TN        | III | n | n | n |   | 127.21 |
| C136 | GSM125013 | T2 N2a     | IIIA | 50 | 0 | None    | p | HER       | III | n | n | p | 0 | 100.68 |
| C138 | GSM125014 | T2 N0      | IIA  | 50 | 0 | None    | n | TN        | III | n | n | n | 3 | 111.07 |
| C139 | GSM125015 | T2 N0      | IIA  | 40 | 0 | None    | n | ER HG     | II  | n | n | n | 0 | 77.26  |
| C140 | GSM125016 | T2 N0      | IIA  | 49 | 0 | None    | n | TN        | III | n | n | n |   | 72.04  |
| C141 | GSM125017 | T1c N0     | I    | 53 | 0 | None    | p | TN        | III | n | n | n |   | 57.76  |
| C142 | GSM125018 | T1c N0     | I    | 50 | 0 | None    | p | TN        | III | n | n | n |   | 54.78  |
| C143 | GSM125019 | T1c N0     | I    | 35 | 1 | Distant | p | TN        | III | n | n | n | 1 | 136.33 |
| C144 | GSM125020 | T2 N0      | IIA  | 50 | 0 | None    | p | TN        | III | n | n | n |   | 126.65 |
| C145 | GSM125021 | T2 N1a     | IIB  | 13 | 1 | Local   | p | HER       | III | n | n | p | 0 | 97.36  |
| C146 | GSM125022 | T1c N0     | I    | 25 | 0 | None    | n | TN        | II  | n | n | n |   | 105.54 |
| C147 | GSM125023 | T2 N0      | IIA  | 1  | 0 | None    | p | TN/ BRCA1 | III | n | n | u |   | 203.81 |
| C148 | GSM125024 | T2 N0      | IIA  | 36 | 0 | None    | p | TN        | III | n | n | n |   | 238.62 |
| C149 | GSM125025 | T2 N0      | IIA  | 39 | 0 | None    | n | TN        | III | n | n | n |   | 158.85 |
| C156 | GSM125105 | T3 N3      | IIIC | 51 | 0 | None    | p | TN        | III | n | n | p | 3 | 122.24 |
| C158 | GSM125106 | T2 N1a     | IIB  | 57 | 1 | Distant | n | ER HG     | I   | p | n | n | 0 | 123.44 |
| C160 |           | T1c N1mi   | IIA  | 56 | 0 | None    | n | ER LG     | I   | p | p | n | 0 | 131.15 |
| C161 | GSM125107 | T3 N2a     | IIIA | 59 | 0 | None    | n | ER HG     | II  | p | p | p | 1 | 103.11 |
| C162 | GSM125108 | T2 N1a     | IIB  | 69 | 0 | None    | p | ER HG     | III | p | p | n |   | 103.58 |
| C163 | GSM125109 | T2 N1a     | IIB  | 71 | 0 | None    | u | HER       | III | p | p | p |   | 162.34 |
| C165 | GSM125110 | T3 N3      | IIIC | 39 | 1 | Distant | p | HER       | III | n | n | p | 2 | 130.87 |
| C169 | GSM125111 | T2 N1a     | IIB  | 0  | 0 | None    | n | ER LG     | I   | p | p | n |   | 93.99  |



Fig 1C

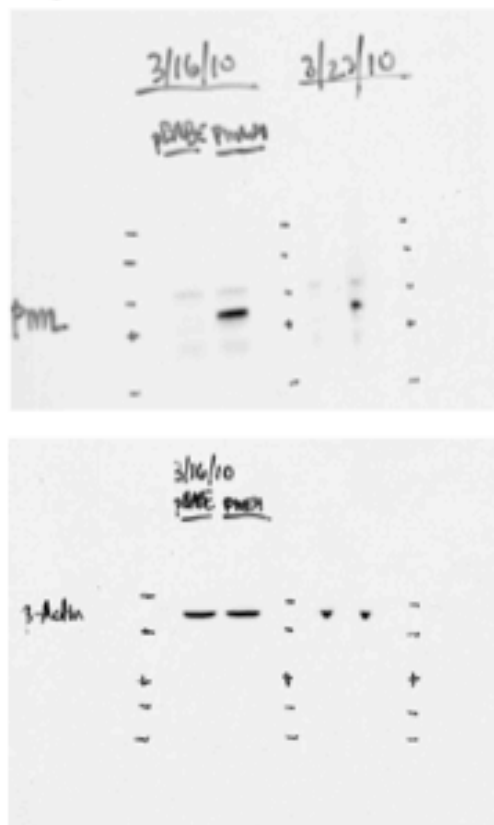

Fig 1D

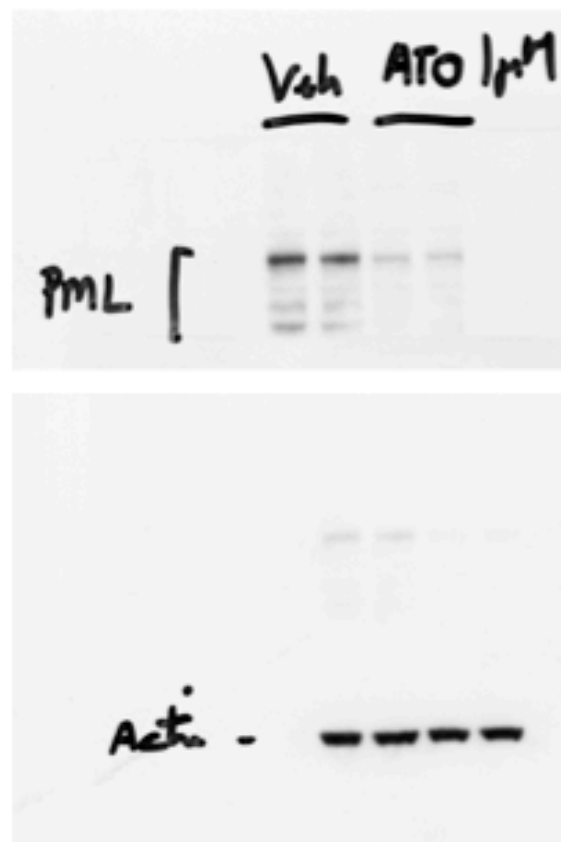

Fig 3C

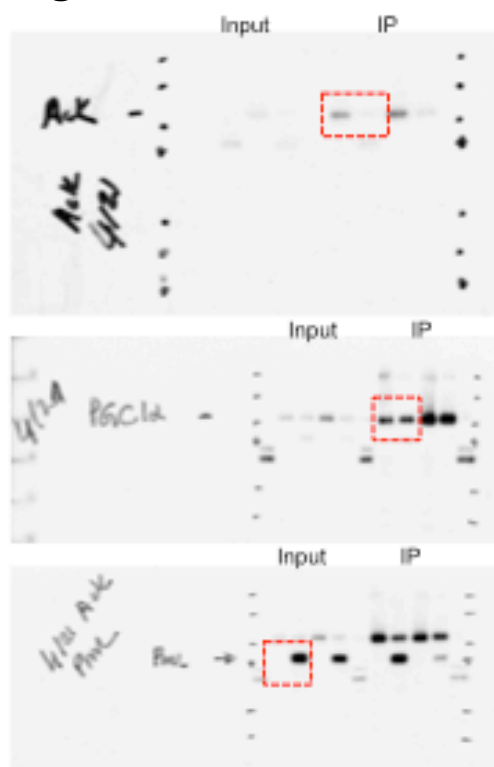

Fig 3D

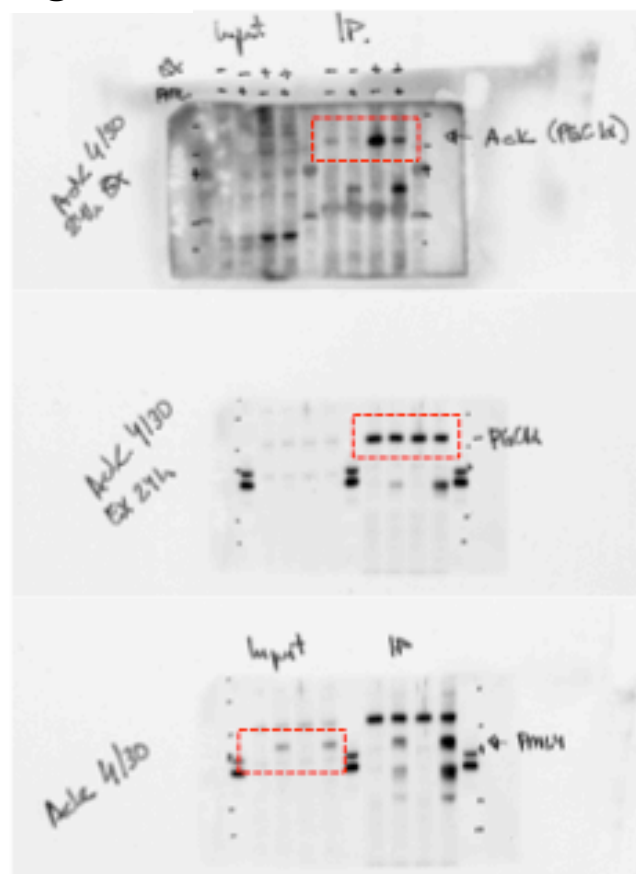

**Fig 4A**

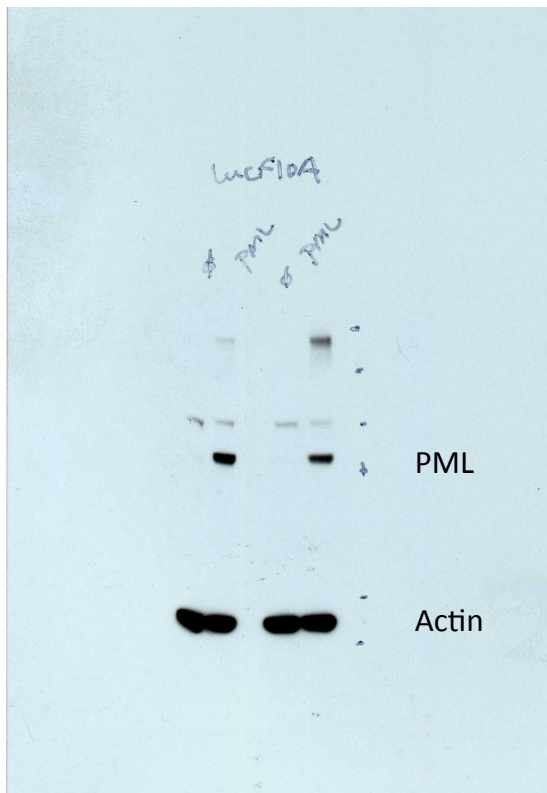

**Fig S2C**

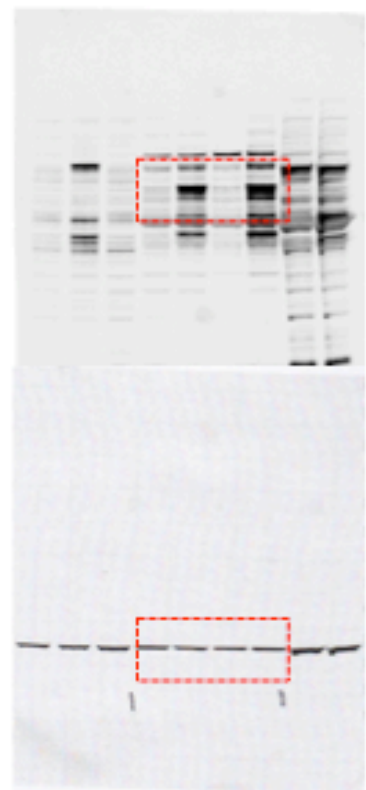

**Fig S2G**

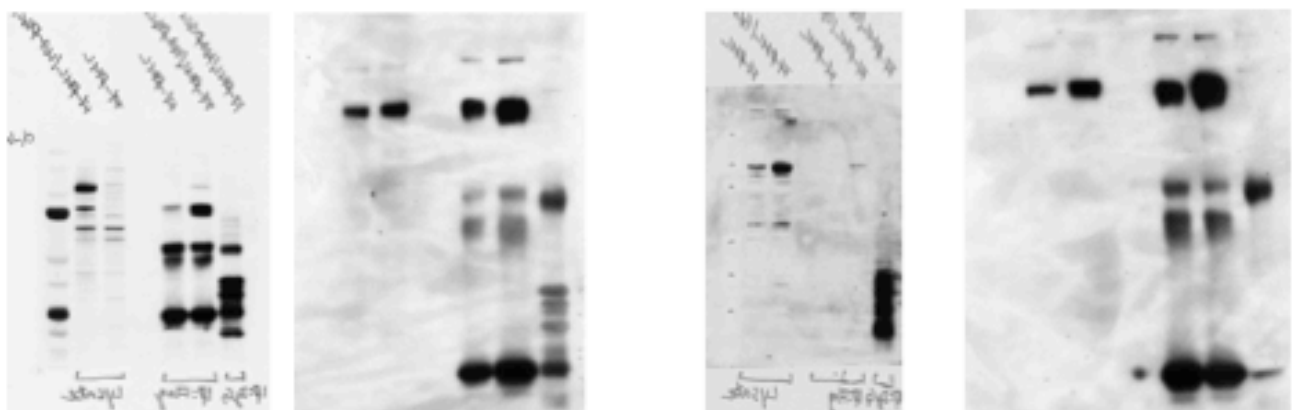

Fig S2G

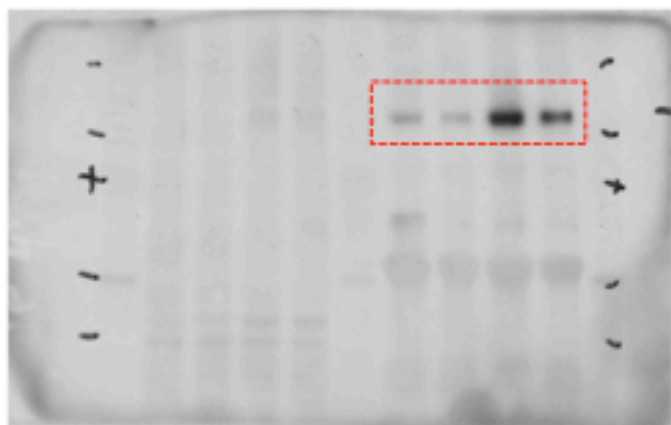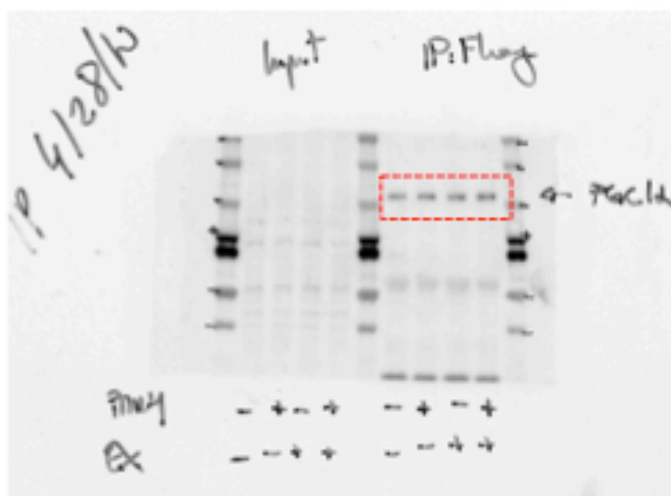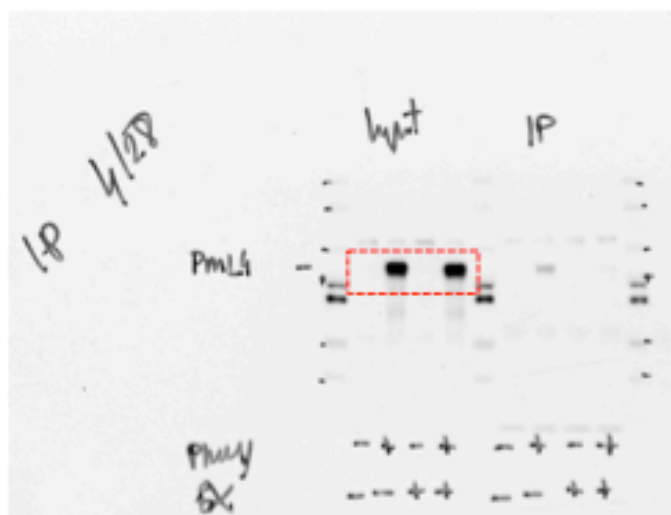

Fig S3C

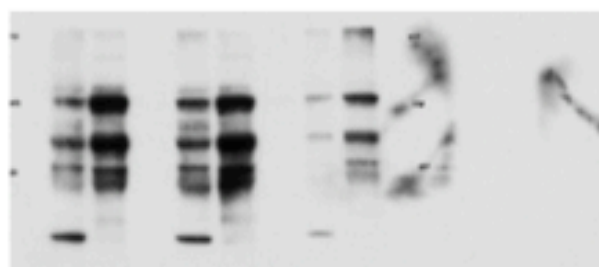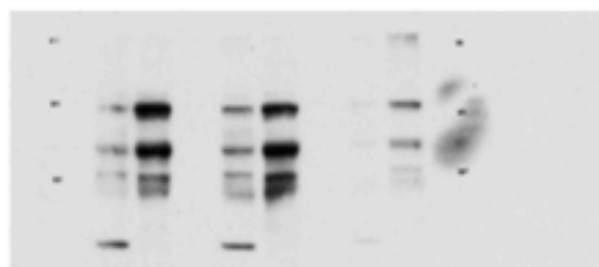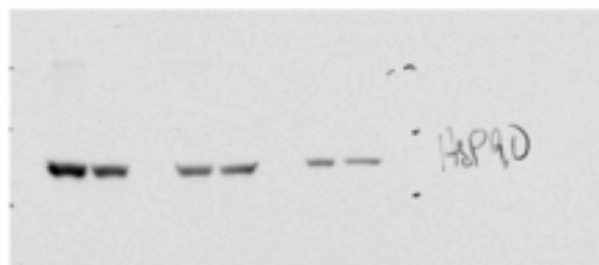

Supplement: JCI62129sd.pdf [file JCI62129sd.pdf]
